1 **Post-hoc analyses of Surrogate Markers of Non-Alcoholic Fatty Liver Disease (NAFLD)**  
2 **and Liver Fibrosis in Patients with Type 2 Diabetes in a Digitally-Supported Continuous**  
3 **Care Intervention: An Open Label, Non-Randomized, Controlled Study**

4  
5 *Eduardo Vilar-Gomez<sup>1</sup>, Shaminie J. Athinarayanan<sup>2</sup>, Rebecca N. Adams<sup>2</sup>, Sarah J. Hallberg<sup>2,3</sup>,*  
6 *Nasir H. Bhanpuri<sup>2</sup>, Amy L. McKenzie<sup>2</sup>, Wayne W. Campbell<sup>4</sup>, James P. McCarter<sup>2,5</sup>, Stephen D.*  
7 *Phinney<sup>2</sup>, Jeff S. Volek<sup>2,6</sup>, Naga Chalasani<sup>1</sup>.*

8 <sup>1</sup> Division of Gastroenterology and Hepatology, Indiana University School of Medicine,  
9 Indianapolis, IN, USA

10 <sup>2</sup> Virta Health, 535 Mission Street, San Francisco, CA, USA

11 <sup>3</sup> Indiana University Health Arnett, Lafayette, IN

12 <sup>4</sup> Department of Nutrition Science, Purdue University, West Lafayette, IN, USA

13 <sup>5</sup> Department of Genetics, Washington University School of Medicine, St. Louis, MO, USA

14 <sup>6</sup> Department of Human Sciences, The Ohio State University, Columbus, OH, USA

15 **Word count: 3996 words**

16 **Tables: 4**

17 **Figures: 1**

18 **Correspondence:**

19 Naga P Chalasani, MD

20 Division of Gastroenterology and Hepatology

21 Indiana University School Medicine

22 Mailing address: 702 Rotary Cir, Suite 225, Indianapolis, IN 46202

23 E-mail: nchalasa@iu.edu

24 Telephone number: (317) 278-0414

25 Fax number: (317) 278-1949

26

27 **DATA SHARING:** Data sets and statistical code used for the current study are available from  
28 the corresponding author on reasonable request.

29

30 **Abbreviations:**

31 **CCI**, continuous care intervention; **UC**, usual care; **NAFLD**, non-alcoholic fatty liver disease;;  
32 **N-LFS**, non-alcoholic liver fatty score; **NFS**, non-alcoholic fatty liver disease fibrosis score;  
33 **CLD**, chronic liver disease; **HCC**, hepatocellular carcinoma; **T2D**, type 2 diabetes; **NASH**, non-  
34 alcoholic steatohepatitis; **BMI**, body mass index; **LCHF**, low-carbohydrate high-fat; **ALT**,  
35 alanine aminotransferase; **AST**, aspartate aminotransferase; **IHLC**, intrahepatic lipid content;  
36 **ADA**, American Diabetes Association; **BHB**, beta-hydroxybutyrate; **CLIA**, clinical laboratory  
37 improvement amendments; **ITT**, intention-to-treat; **MIM**, multiple imputation methods; **WL**,  
38 weight loss; **EOT**, end-of-treatment; **HDL**, high density lipoprotein; **RCT**, randomized  
39 controlled trial; **LCD**, low-carbohydrate diet; **KD**, ketogenic diet; **HFD**, high-fat diet.

40

41

42

43

44 **ABSTRACT**

45 **Objective:** One-year of comprehensive continuous care intervention (CCI) through nutritional  
46 ketosis improves HbA1c, body weight and liver enzymes among type 2 diabetes (T2D) patients.  
47 Here, we report the effect of the CCI on surrogate scores of non-alcoholic fatty liver disease  
48 (NAFLD) and liver fibrosis.

49 **Methods:** This was a non-randomized longitudinal study, including adults with T2D who were  
50 self-enrolled to the CCI (n=262) or to receive usual care (UC, n=87) during one year. A NAFLD  
51 liver fat score [N-LFS]  $> -0.640$  defined the presence of fatty liver. A NAFLD fibrosis score  
52 [NFS] of  $> 0.675$  identified subjects with advanced fibrosis. Changes in N-LFS and NFS at one  
53 year were the main endpoints.

54 **Results:** At baseline, NAFLD was present in 95% of patients in the CCI and 90% of patients in  
55 the UC. At one year, weight loss of  $\geq 5\%$  was achieved in 79% of patients in the CCI vs. 19% of  
56 patients in UC ( $P<0.001$ ). N-LFS mean score was reduced in the CCI group ( $-1.95\pm 0.22$ ,  
57  $P<0.001$ ) whereas it was not changed in the UC ( $0.47\pm 0.41$ ,  $P=0.26$ ) (CCI vs. UC,  $P<0.001$ ).  
58 NFS was reduced in the CCI group ( $-0.65\pm 0.06$ ,  $P<0.001$ ) compared with UC ( $0.26\pm 0.11$ ,  
59  $P=0.02$ ) ( $P<0.001$  between two groups). In the CCI group, the percentage of individuals with a  
60 low probability of advanced fibrosis increased from 18% at baseline to 33% at 1 year ( $P<0.001$ ).

61 **Conclusions:** One year of a digitally-supported CCI significantly improved surrogates of  
62 NAFLD and advanced fibrosis in patients with type 2 diabetes. (**Word count:** 249)

63 **Key words:** Type 2 diabetes, very-low carb diet, ketogenic diet, non-alcoholic fatty liver  
64 disease, liver fibrosis, weight loss.

65

66 **Article Summary**

67 **Strengths and limitations of this study**

- 68       • This study highlights the beneficial effect of the CCI on NAFLD in high risk patients  
69       with T2D
- 70       • This study also identifies positive associations between glycemic improvements and  
71       improvements in ALT levels
- 72       • The assessment of resolution of steatosis and fibrosis is limited by the sensitivity and  
73       specificity of the non-invasive markers used in the study
- 74       • The patients were restricted in their carbohydrate intake and monitored for their  
75       nutritional ketosis state, but dietary energy, macronutrient and micronutrient intakes were  
76       not assessed.

77

78

79

80

81

82

83

84

85

## 86 **INTRODUCTION**

87           Non-alcoholic fatty liver disease (NAFLD) is an important cause of chronic liver disease  
88 (CLD), hepatocellular carcinoma (HCC) and liver transplant worldwide, and is associated with  
89 increased risk of heart disease, diabetes, chronic kidney disease and malignancies[1-4]. NAFLD  
90 is highly prevalent (~70%) among patients with obesity and type 2 diabetes (T2D)[5]. T2D is  
91 usually associated with the more aggressive form of NAFLD, including non-alcoholic  
92 steatohepatitis (NASH, indicating significant hepatocellular injury) and advanced fibrosis[6] and  
93 is linked with high risk for all-cause and liver-related mortality[7-10]. Currently, there are no  
94 approved pharmacological interventions for NASH. Weight loss via lifestyle changes including  
95 dietary modification and exercise is the first-line intervention used in treating and improving  
96 NAFLD/NASH[11, 12]. However, the majority of patients do not achieve or sustain targeted  
97 weight loss goals[11, 13]. Previous studies show a close relationship between the degree of  
98 weight reduction and improvements in most of the NASH-related features, including steatosis,  
99 inflammation, fibrosis, insulin resistance and elevated liver enzymes, irrespective of the type of  
100 diet consumed[13-22]. However, there is an intense debate about what types of diet are most  
101 effective for treating NASH and, to date, the optimal degree of energy restriction and  
102 macronutrient composition of dietary interventions in subjects with NASH and T2D are not well  
103 defined[12].

104           Low-carbohydrate, high-fat (LCHF) and ketogenic diets have demonstrated a superior  
105 weight loss effect to low-fat, high-carbohydrate (LFHC) diets in adults with overweight and  
106 obesity[23-26] and short-term interventions with very low-carbohydrate diets are associated with  
107 improved insulin sensitivity and glycemic control[27, 28]. Lower consumption of carbohydrate,

108 LCHF and ketogenic diets improve appetite control, satiety and/or reduce daily food intake  
109 helping to limit dietary energy consumption while maintaining patient-perceived vigor[29]. In  
110 patients with NAFLD, the beneficial effects of LCHF diets on liver enzymes and intrahepatic  
111 lipid content (IHLC) have been explored with contradictory results. Among studies with varied  
112 carbohydrate intakes, some reported a significant reduction of aminotransferases[16, 30-32],  
113 while others did not report significant changes in these enzymes[17, 33, 34]. A recent meta-  
114 analysis of pooled data from 10 clinical trials reported that low carbohydrate diet (LCD) in  
115 patients with NAFLD led to a significant reduction in IHLC[35].

116 We recently demonstrated that one-year of a telemedicine-based comprehensive  
117 continuous care intervention (CCI) with carbohydrate restriction-induced ketosis and behavior  
118 change support significantly reduced HbA1c level and medication usage in patients with  
119 T2D[36]. The effectiveness of the CCI relies in maintaining a carbohydrate-restricted diet, and  
120 monitoring compliance with the dietary regimen by assessing the patient's nutritional ketosis by  
121 blood tests during the year. We also demonstrated that one year of the CCI was effective in  
122 improving liver enzymes, where mean alanine aminotransferase (ALT), aspartate  
123 aminotransferase (AST) and alkaline phosphatase (ALP) were reduced by 29%, 20% and 13%,  
124 all  $P < .01$ , respectively. These findings not only highlight the beneficial effect of the CCI on  
125 diabetes management, but also in ameliorating the liver-related injury. These changes were not  
126 reported in the usual care (UC) patients receiving standard diabetes care treatment. Therefore, in  
127 the current post-hoc analysis, we assessed one-year within- and between-group (CCI vs. usual  
128 care; UC) differences in non-invasive liver markers of steatosis (NAFLD liver fat score) and  
129 fibrosis (NAFLD fibrosis score) in the full study sample (CCI and UC cohorts). In addition, we  
130 assessed these outcomes, in the subgroup of patients with abnormal ALT at baseline (ALT levels

131 of > 30 U/L in men and >19 U/L in women). Among all patients, ancillary aims included  
132 assessing if changes in weight and HbA1c were associated with ALT and metabolic parameter  
133 improvements, and potential relationships between changes in the ALT with other metabolic  
134 parameters.

## 135 **METHODS**

136 The design and primary results of this study were previously published, and the current  
137 results are based on a 1-year post-hoc analysis using the data collected from the same cohort in  
138 that clinical study (*Clinical trials.gov identifier: NCT02519309*)[36]. A brief description of the  
139 study design, participants and interventions are listed in the **supplementary appendix (Methods**  
140 **section)**. Briefly, this was a non-randomized and open-label controlled longitudinal study,  
141 including patients 21 to 65 years of age with a diagnosis of T2D and a BMI > 25 kg/m<sup>2</sup>. Further,  
142 patients were excluded if they had significant alcohol intake (average consumption of three or  
143 more alcohol-containing beverages daily or consumption of more than 14 standard drinks per  
144 week), presence of any other cause of liver disease or secondary causes of NAFLD and  
145 decompensated cirrhosis.

### 146 ***Patient and public involvement***

147 Patients were not involved in the design and implementation of the study. Patient  
148 participants have been thanked for their participation in all resulting manuscripts and will receive  
149 information on publications upon study completion.

### 150 ***Study Recruitment and intervention***

151 Patients participating in the CCI had access to a remote care team consisting of a personal  
152 health coach and medical providers (physician or nurse practitioner). The participants in the CCI  
153 self-selected between two different educational modes; either via on-site education classes

154 (n=136, CCI-onsite) or via web-based educational content (n=126, CCI-virtual). The CCI  
155 patients were routinely assessed for nutritional ketosis based on blood beta-hydroxybutyrate  
156 (BHB) concentrations. We also recruited and followed a cohort of UC patients with T2D (n=87)  
157 who received a standard diabetes care treatment from their primary care physician or  
158 endocrinologist without modification[36,37].

## 159 *Outcomes*

### 160 *Primary outcomes-NAFLD liver fat and liver fibrosis by non-invasive surrogate markers*

161 NAFLD liver fat score (N-LFS) is a surrogate marker of fatty liver which includes the  
162 presence of the metabolic syndrome, type 2 diabetes, fasting serum insulin, AST and the  
163 AST/ALT ratio. An N-LFS cutoff of  $> -0.640$  predicts liver fat ( $> 5.56\%$  of hepatocytes) with a  
164 sensitivity of 86% and specificity of 71% [38, 39]. NAFLD fibrosis score (NFS) is a widely  
165 validated biomarker for identifying patients at different risks of fibrosis severity. NFS is derived  
166 from age, BMI, hyperglycemia, the AST/ALT ratio, platelet and albumin. The NFS threshold of  
167  $< -1.455$  can reliably exclude patients with advanced fibrosis (negative predictive value  $\approx 92\%$ )  
168 and  $> 0.675$  can accurately detect subjects with advanced fibrosis (positive predictive value  $\approx$   
169 85%)[40-42]. The equations for calculating both scores are displayed in the **supplementary**  
170 **appendix (Methods section)**.

### 171 *Ancillary outcomes- other biochemical markers*

172 Results from other metabolic (HbA1c, fasting glucose, fasting insulin, HOMA-IR,  
173 triglycerides, total cholesterol, HDL cholesterol and LDL cholesterol), liver (ALT, AST, ALP),  
174 kidney (creatinine, eGFR), beta-hydroxybutyrate (BHB) and high sensitivity C-reactive protein  
175 (hsCRP) parameters were previously published in the full CCI and UC cohort [36]. These



176 additional biochemical markers were assessed in the subset analyses of patients with abnormal  
177 ALT at baseline[43].

178

### 179 *Statistical analyses*

180 First, we examined the assumptions of normality and linearity. According to Kline's  
181 (2011) guidelines [44], seven outcomes (i.e., N-LFS, ALT, AST, fasting insulin, triglycerides, c-  
182 reactive protein, beta hydroxybutyrate) were positively skewed. We explored two approaches to  
183 handling the skewed variables: natural log-transformations and removing the top 1% of values.  
184 For N-LFS which includes both positive and negative values, a modulus log-transformation[45]  
185 was performed instead of a natural log-transformation. For every variable except triglycerides,  
186 both approaches resulted in new skew and kurtosis values falling within the acceptable range.  
187 We conducted sensitivity analyses related to our first aim to compare the two approaches. The  
188 results did not differ between the two approaches, and to make interpretation feasible, we report  
189 results from the approach of removing the top 1% of values for the LMM analyses. For  
190 triglycerides, analyses were performed on the log-transformed variable; p-values reported are  
191 based on analyses with the transformed variable but the means and standard errors reported were  
192 computed from the original variable without any adjustments. For both ANCOVA and  
193 correlation analyses, the natural or modulus log-transformed variables were used to determine  
194 the association.

195 The first aim of the study was to examine (1) within-group changes in the study outcomes  
196 from baseline to 1 year, and (2) between-group differences (CCI vs. UC) in the study outcomes  
197 at 1 year. The on-site and virtual CCI patients were grouped together for analyses since no  
198 significant differences were observed in biochemical markers between these two modes of

199 educational delivery[36]. We performed linear mixed-effects models (LMMs) in SPSS statistics  
200 software to estimate the within- and between-group differences. The LMMs included fixed  
201 effects for time, group (CCI vs. UC), and time by group interaction. Covariates included baseline  
202 age, sex, race (African American vs. other), diabetes duration, body mass index (BMI), and  
203 insulin use. This maximum likelihood-based approach uses all available repeated data, resulting  
204 in an intent-to-treat analysis. An unstructured covariance structure was specified for all models to  
205 account for correlations between repeated measures. Most analyses were conducted on a  
206 subsample of participants with abnormal (>30 U/L in men and >19 U/L in women) [46] ALT at  
207 baseline (195 of 347; 157 CCI and 38 UC). We also conducted analyses assessing changes in N-  
208 LFS, NFS, albumin, and platelets on the full study sample because results were not previously  
209 reported. In addition, we examined changes in the proportions of participants meeting clinically-  
210 relevant cut-offs for N-LFS, NFS, and ALT. Within-group changes in the proportions from  
211 baseline to 1 year were assessed using McNemar's test. Between-group differences in  
212 proportions were assessed using Chi-Square test. For this set of analyses, multiple imputation (20  
213 imputations) was used to replace missing values from baseline and 1 year with a set of plausible  
214 values, facilitating an intent-to-treat analysis.

215         The second study aim was to explore relationships between (1) changes in weight loss  
216 and HbA1c categories and its associations with ALT and metabolic parameters improvements  
217 and (2) changes in ALT and metabolic variables. Multiple imputation was also used to handle  
218 missing data for aim 2 analyses. We performed one-way longitudinal ANCOVA analyses for  
219 comparisons between different cutoffs of weight loss (<5%, 5-10% and >10%) and with changes  
220 in diabetes- and liver-related continuous variables. Covariates included baseline value of the  
221 dependent variables and body mass index (BMI). Trend analyses were performed using Mantel-

222 Haenszel  $\chi^2$  tests to assess changes in the proportions of patients meeting clinical cut-offs (for  
223 ALT, N-LFS and NFS normalization) within different weight and HbA1c categories. An  
224 adjusted odds ratio was calculated to measure the strength of association between HbA1c  
225 changes and ALT normalization using logistic regression (Figure 1B). The logistic regression  
226 analysis was adjusted by BMI, age, gender and baseline dependent covariates. Unadjusted and  
227 adjusted Pearsons' correlations were performed to identify relationships between changes in  
228 ALT levels and changes in metabolic- and lipid-related parameters from baseline to 1 year.  
229 Adjusted correlations were also performed while controlling for baseline dependent covariates,  
230 baseline age, sex, race (African American vs. other), diabetes duration, body mass index (BMI),  
231 and insulin use. All confidence intervals, significance tests, and resulting *P* values were two-  
232 sided, with an alpha level of 0.05. A Bonferroni correction was applied to each set of analyses  
233 (LMM or ANCOVA) to control the family-wise error rate (FWER). The Bonferroni adjusted p-  
234 value =  $0.05/19$  variables = 0.0025 was used to determine statistical significance for each set of  
235 hypothesis driven analyses.

## 236 **RESULTS**

### 237 *Baseline features of participants*

238 Recruitment and baseline results were published previously[36]. Briefly, between August  
239 2015 and April 2016, 262 and 87 patients were enrolled in the CCI and UC groups, respectively.

240 **Supplemental Figure 1** shows the flow of patients through the study. At baseline, average age  
241 was  $53.4 \pm 8.7$  years and 226 participants (65%) were female. The average time since T2D  
242 diagnosis was  $8.3 \pm 7.2$  years and 314 subjects (90%) were obese with a mean BMI of 39.5[35].  
243 Two-hundred and ninety-three participants (84%) were on medication for diabetes and 118  
244 (34%) were insulin users[36]. The proportion of patients with abnormal ALT was higher in CCI

245 (58%) compared to the UC (44%). At baseline, 330 subjects (95%) had suspicion of NAFLD and  
246 fewer patients (69 of 349 [20%]) had a NFS threshold of  $< -1.455$  indicating low probability of  
247 advanced fibrosis. Compared to UC, mean baseline BMI was significantly higher in patients in  
248 the CCI. The remaining patient demographics and baseline features were generally not different  
249 between the two groups [36, 47].

250

### 251 *Influence of intervention and time on 1-year study endpoints*

#### 252 *Non-invasive markers of steatosis (N-LFS) and NAFLD fibrosis (NFS).*

253 After one year, the CCI decreased N-LFS and NFS for the full cohort and among patients with  
254 abnormal ALT at baseline, whereas no changes were observed in the UC full cohort or subset  
255 (Table 1). There were significant between group (CCI vs. UC) differences in N-LFS and NFS  
256 observed in both the full and abnormal baseline ALT cohort at one year (Table 1). Notably, the  
257 proportion of patients with suspected steatosis reduced from 95% to 75% at 1 year in the CCI  
258 whereas no change occurred in UC. At 1 year, the proportion of patients without fibrosis  
259 increased from 18% to 33% in CCI group,  $P < 0.001$ , but no change occurred in the UC. Similar  
260 to the full cohort, the proportion of patients with suspected steatosis was reduced from 99% to  
261 76%,  $P < 0.001$  and proportion of those without fibrosis increased from 20% to 37%,  $P < 0.001$   
262 through one year among CCI patients with abnormal ALT levels (Table 2). Between-group (CCI  
263 vs. UC) differences at 1 year are listed in Table 1.

264

#### 265 *Metabolic parameters.*

266 At 1 year, beneficial changes observed in the metabolic parameters of the full CCI  
267 cohort[35,44] were also reported in the subset of patients with abnormal baseline ALT, including

268 reduction of HbA1c, fasting glucose, fasting insulin, HOMA-IR, triglycerides (All,  $P < 0.001$ ),  
269 and increase of HDL-C ( $P < 0.001$ ) (Table 1). No changes in metabolic parameters were observed  
270 in the UC group. Between-group (CCI vs. UC) differences at 1 year are listed in Table 1.

271

### 272 *Other liver-related, kidney-function tests and parameters*

273 Among CCI patients with abnormal ALT at baseline, significant reductions in the liver  
274 enzymes were observed (Table 1), as previously reported in the full CCI cohort. No changes in  
275 liver-related tests were observed in the UC group. Among patients with increased ALT levels at  
276 baseline, 93 (61%) of 153 participants enrolled in the CCI vs. 3 (8%) of 38 patients in UC had  
277 ALT normalization at 1 year (Table 2). Significant within-CCI changes were observed for  
278 albumin and platelet in the full CCI cohort, whereas in the subsample of patients with abnormal  
279 baseline ALT, there was only a significant decrease in the platelet (Table 1). As reported in the  
280 full CCI cohort [35], significant changes in c-reactive and beta-hydroxybutyrate concentrations  
281 were found in the subset of CCI patients with abnormal baseline ALT over 1 year. These  
282 changes were not found in the UC group. When adjusted for multiple comparisons, no significant  
283 changes in creatinine or eGFR were found in either the CCI or UC group. Between-group  
284 differences at 1 year are listed in Table 1.

285

286 **Table 1.** Estimated marginal means and mean changes in metabolic, liver-related and non-invasive markers at baseline and after one  
 287 year of the CCI and UC interventions.  
 288

| Variables                                      | Baseline    |      | 1 Year      |                        | Change               |                         |
|------------------------------------------------|-------------|------|-------------|------------------------|----------------------|-------------------------|
|                                                | Mean± SE    | p    | Mean± SE    | p                      | Mean difference ± SE | p                       |
| <b>Full cohort (CCI, n=262 and UC, n=87)</b>   |             |      |             |                        |                      |                         |
| <b>Non-invasive biomarker</b>                  |             |      |             |                        |                      |                         |
| <b>NAFLD-LFS<sup>b,c</sup></b>                 |             |      |             |                        |                      |                         |
| CCI                                            | 3.26±0.21   |      | 1.30±0.19   |                        | -1.95±0.22           | 3.3 x 10 <sup>-16</sup> |
| UC                                             | 3.25±0.38   |      | 3.71±0.35   |                        | 0.47±0.41            | 0.26                    |
| CCI vs UC                                      | 0.01±0.44   | 0.44 | -2.41±0.41  | 9.8 x 10 <sup>-9</sup> |                      |                         |
| <b>NAFLD fibrosis score<sup>b</sup></b>        |             |      |             |                        |                      |                         |
| CCI                                            | -0.32±0.06  |      | -0.97±0.07  |                        | -0.65±0.06           | 6.5 x 10 <sup>-22</sup> |
| UC                                             | -0.45±0.11  |      | -0.19±0.12  |                        | 0.26±0.11            | 0.02                    |
| CCI vs UC                                      | 0.13±0.13   | 0.31 | -0.78±0.14  | 4.3 x 10 <sup>-8</sup> |                      |                         |
| <b>Liver-related tests</b>                     |             |      |             |                        |                      |                         |
| <b>Albumin (g/dl)<sup>b</sup></b>              |             |      |             |                        |                      |                         |
| CCI                                            | 4.43±0.02   |      | 4.51±0.02   |                        | 0.08±0.02            | 4.7 x 10 <sup>-6</sup>  |
| UC                                             | 4.42±0.04   |      | 4.42±0.03   |                        | -0.01±0.03           | 0.87                    |
| CCI vs UC                                      | 0.01±0.04   | 0.84 | 0.09±0.04   | 0.02                   |                      |                         |
| <b>Platelet (x 10<sup>9</sup>)<sup>b</sup></b> |             |      |             |                        |                      |                         |
| CCI                                            | 250.52±3.86 |      | 227.60±3.69 |                        | -22.92±2.28          | 1.6 x 10 <sup>-30</sup> |
| UC                                             | 252.96±6.91 |      | 241.87±6.53 |                        | -11.09±3.88          | 0.005                   |
| CCI vs UC                                      | -2.44±8.03  | 0.76 | -14.27±7.62 | 0.06                   |                      |                         |

**Abnormal ALT cohort (CCI, n= 153 and UC, n=38)**

| <b>Non-invasive biomarker</b>               |             |      |             |                        |             |                         |
|---------------------------------------------|-------------|------|-------------|------------------------|-------------|-------------------------|
| <b>NAFLD-LFS<sup>a,c</sup></b>              |             |      |             |                        |             |                         |
| CCI                                         | 3.96±0.28   |      | 1.46±0.26   |                        | -2.50±0.30  | 1.5 x 10 <sup>-13</sup> |
| UC                                          | 4.44±0.58   |      | 4.53±0.57   |                        | 0.09±0.66   | 0.90                    |
| CCI vs UC                                   | -0.48±0.65  | 0.46 | -3.06±0.63  | 2.7 x 10 <sup>-6</sup> |             |                         |
| <b>NAFLD fibrosis score<sup>a</sup></b>     |             |      |             |                        |             |                         |
| CCI                                         | -0.43±0.08  |      | -1.14±0.09  |                        | -0.71±0.08  | 7.5 x 10 <sup>-15</sup> |
| UC                                          | -0.62±0.17  |      | -0.35±0.18  |                        | 0.26±0.17   | 0.12                    |
| CCI vs UC                                   | 0.19±0.19   | 0.33 | -0.79±0.20  | 0.0002                 |             |                         |
| <b>Metabolic Parameters</b>                 |             |      |             |                        |             |                         |
| <b>HbA1c (%)<sup>a</sup></b>                |             |      |             |                        |             |                         |
| CCI                                         | 7.50±0.10   |      | 6.16±0.10   |                        | -1.35±0.11  | 3.6 x 10 <sup>-25</sup> |
| UC                                          | 7.10±0.21   |      | 7.32±0.18   |                        | 0.22±0.23   | 0.33                    |
| CCI vs UC                                   | 0.41±0.23   | 0.08 | -1.16±0.20  | 3.4 x 10 <sup>-8</sup> |             |                         |
| <b>Fasting glucose (mg/dl)<sup>a</sup></b>  |             |      |             |                        |             |                         |
| CCI                                         | 158.34±4.42 |      | 124.05±3.94 |                        | -34.29±5.10 | 2.4 x 10 <sup>-10</sup> |
| UC                                          | 139.79±9.15 |      | 152.13±8.08 |                        | 12.34±10.37 | 0.24                    |
| CCI vs UC                                   | 18.55±10.19 | 0.07 | -28.09±9.05 | 0.02                   |             |                         |
| <b>Fasting insulin (m/UI)<sup>a,c</sup></b> |             |      |             |                        |             |                         |
| CCI                                         | 30.16±1.75  |      | 18.01±1.56  |                        | -12.15±1.78 | 3.0 x 10 <sup>-10</sup> |
| UC                                          | 32.15±3.63  |      | 30.01±3.41  |                        | -2.14±3.82  | 0.58                    |
| CCI vs UC                                   | -1.99±4.04  | 0.62 | -12.00±3.77 | 0.002                  |             |                         |

|                                            |              |      |               |                        |              |                         |
|--------------------------------------------|--------------|------|---------------|------------------------|--------------|-------------------------|
| <b>HOMA-IR<sup>a</sup></b>                 |              |      |               |                        |              |                         |
| CCI                                        | 9.57±0.60    |      | 5.18±0.70     |                        | -4.38±0.78   | 8.7 x 10 <sup>-8</sup>  |
| UC                                         | 11.51±1.18   |      | 13.73±1.43    |                        | 2.22±1.56    | 0.16                    |
| CCI vs UC                                  | -1.95±1.33   | 0.14 | -8.56±1.60    | 3.7 x 10 <sup>-7</sup> |              |                         |
| <b>Triglycerides (mg/dl)<sup>a,d</sup></b> |              |      |               |                        |              |                         |
| CCI                                        | 197.54±8.74  |      | 162.59±15.85  |                        | -34.95±17.35 | 2.7 x 10 <sup>-9</sup>  |
| UC                                         | 232.18±24.87 |      | 267.29±47.90  |                        | 35.11±51.34  | 0.62                    |
| CCI vs UC                                  | -34.64±21.50 | 0.12 | -104.70±39.84 | 0.0001                 |              |                         |
| <b>Cholesterol (mg/dl)<sup>a</sup></b>     |              |      |               |                        |              |                         |
| CCI                                        | 181.58±3.35  |      | 197.13±4.46   |                        | 15.55±4.05   | 0.0001                  |
| UC                                         | 178.91±7.02  |      | 182.69±9.51   |                        | 3.78±8.68    | 0.66                    |
| CCI vs UC                                  | 2.67±7.82    | 0.73 | 14.44±10.53   | 0.17                   |              |                         |
| <b>HDL cholesterol (mg/dl)<sup>a</sup></b> |              |      |               |                        |              |                         |
| CCI                                        | 41.67±1.10   |      | 50.18±1.30    |                        | 8.51±1.15    | 9.2 x 10 <sup>-12</sup> |
| UC                                         | 36.60±2.30   |      | 33.45±2.77    |                        | -3.15±2.46   | 0.20                    |
| CCI vs UC                                  | 5.07±2.56    | 0.05 | 16.73±3.07    | 1.8 x 10 <sup>-7</sup> |              |                         |
| <b>LDL cholesterol (mg/dl)<sup>a</sup></b> |              |      |               |                        |              |                         |
| CCI                                        | 100.31±2.85  |      | 117.16±3.42   |                        | 16.86±3.26   | 8.7 x 10 <sup>-7</sup>  |
| UC                                         | 98.12±6.23   |      | 90.22±7.87    |                        | -7.90±7.56   | 0.30                    |
| CCI vs UC                                  | 2.19±6.88    | 0.75 | 26.94±8.60    | 0.002                  |              |                         |
| <b>Liver-related tests</b>                 |              |      |               |                        |              |                         |
| <b>ALT (U/L)<sup>a,c</sup></b>             |              |      |               |                        |              |                         |
| CCI                                        | 37.00±1.24   |      | 23.55±1.32    |                        | -13.44±1.59  | 2.7 x 10 <sup>-14</sup> |
| UC                                         | 37.86±2.56   |      | 38.04±2.68    |                        | 0.18±3.23    | 0.96                    |
| CCI vs UC                                  | -0.86±2.86   | 0.76 | -14.49±3.01   | 3.5 x 10 <sup>-6</sup> |              |                         |



|                                                |              |      |              |                        |             |                         |
|------------------------------------------------|--------------|------|--------------|------------------------|-------------|-------------------------|
| <b>AST (U/L)<sup>a,c</sup></b>                 |              |      |              |                        |             |                         |
| CCI                                            | 27.11±0.97   |      | 19.77±0.83   |                        | -7.34±1.00  | 8.9 x 10 <sup>-12</sup> |
| UC                                             | 27.69±2.03   |      | 28.55±1.73   |                        | 0.86±2.09   | 0.68                    |
| CCI vs UC                                      | -0.59±2.26   | 0.80 | -8.78±1.93   | 1.1 x 10 <sup>-5</sup> |             |                         |
| <b>ALP (U/L)<sup>a</sup></b>                   |              |      |              |                        |             |                         |
| CCI                                            | 74.07±2.00   |      | 64.53±2.02   |                        | -9.55±1.33  | 2.5 x 10 <sup>-11</sup> |
| UC                                             | 79.79±4.16   |      | 81.02±4.18   |                        | 1.23±2.68   | 0.65                    |
| CCI vs UC                                      | -5.72±4.64   | 0.22 | -16.49±4.67  | 0.0005                 |             |                         |
| <b>Albumin (g/dl)<sup>a</sup></b>              |              |      |              |                        |             |                         |
| CCI                                            | 4.50±0.02    |      | 4.56±0.02    |                        | 0.06±0.02   | 0.004                   |
| UC                                             | 4.52±0.05    |      | 4.48±0.05    |                        | -0.04±0.05  | 0.35                    |
| CCI vs UC                                      | -0.02±0.05   | 0.64 | 0.08±0.05    | 0.11                   |             |                         |
| <b>Platelet (x 10<sup>9</sup>)<sup>a</sup></b> |              |      |              |                        |             |                         |
| CCI                                            | 247.45±5.21  |      | 225.87±5.06  |                        | -21.57±3.11 | 9.8 x 10 <sup>-11</sup> |
| UC                                             | 249.46±10.84 |      | 240.78±10.48 |                        | -8.69±6.30  | 0.17                    |
| CCI vs UC                                      | -2.02±12.09  | 0.87 | -14.90±11.71 | 0.21                   |             |                         |
| <b>Kidney function tests</b>                   |              |      |              |                        |             |                         |
| <b>Creatinine (mg/dl)<sup>a</sup></b>          |              |      |              |                        |             |                         |
| CCI                                            | 0.86±0.02    |      | 0.82±0.01    |                        | -0.05±0.01  | 0.0005                  |
| UC                                             | 0.83±0.03    |      | 0.83±0.03    |                        | -0.01±0.03  | 0.85                    |
| CCI vs UC                                      | 0.03±0.03    | 0.39 | -0.01±0.03   | 0.71                   |             |                         |
| <b>eGFR (CKD-EPI)<sup>a</sup></b>              |              |      |              |                        |             |                         |
| CCI                                            | 81.53±0.90   |      | 83.32±0.88   |                        | 1.79±0.75   | 0.02                    |
| UC                                             | 82.26±1.86   |      | 81.72±1.81   |                        | -0.54±1.53  | 0.72                    |
| CCI vs UC                                      | -0.73±2.08   | 0.72 | 1.60±2.03    | 0.43                   |             |                         |

---

**Other parameters**

---

**CRP (mg/dl)<sup>a,c</sup>**

|           |            |      |            |                        |            |                       |
|-----------|------------|------|------------|------------------------|------------|-----------------------|
| CCI       | 6.85±0.50  |      | 4.51±0.50  |                        | -2.34±0.48 | 2.4 x 10 <sup>6</sup> |
| UC        | 9.41±1.03  |      | 9.84±1.04  |                        | 0.43±0.97  | 0.66                  |
| CCI vs UC | -2.56±1.15 | 0.03 | -5.33±1.16 | 8.2 x 10 <sup>-6</sup> |            |                       |

**BHB (mmol/l)<sup>a,c</sup>**

|           |           |      |           |       |            |                       |
|-----------|-----------|------|-----------|-------|------------|-----------------------|
| CCI       | 0.17±0.01 |      | 0.26±0.02 |       | 0.09±0.02  | 7.3 x 10 <sup>5</sup> |
| UC        | 0.15±0.03 |      | 0.12±0.04 |       | -0.03±0.04 | 0.45                  |
| CCI vs UC | 0.02±0.03 | 0.50 | 0.14±0.04 | 0.002 |            |                       |

---

289

290 Note. Unless otherwise noted, estimates reported were obtained from linear mixed-effects models which provide marginal means and mean changes,

291 adjusting for baseline age, gender, race, diabetes duration, body mass index, and insulin use.

292 This maximum likelihood-based approach uses all available repeated data, resulting in an intent-to-treat analysis.

293 **Abbreviations:** SE, standard error; ALT, alanine aminotransferase; AST, aspartate aminotransferase; ALP, alkaline phosphatase;

294 HbA1c, Glycosylated hemoglobin; HDL, high-density lipoprotein; LDL, low-density lipoprotein; eGFR, estimated glomerular filtration rates;

295 CKD-EPI, chronic kidney disease-epidemiological collaboration equation; BHB, beta-hydroxybutyrate; NAFLD, nonalcoholic fatty liver disease;

296 LFS, liver fat score.

297

298 <sup>a</sup> Subgroup analysis of participants with abnormal ALT at baseline. Abnormal ALT refers to >19 U/L for women and 30 U/L for men.

299 <sup>b</sup> Full sample analysis.

300 <sup>c</sup> Variable was positively skewed and after removing the top 1% of values, skew and kurtosis values fell within acceptable ranges.  
301 Analyses were conducted on data excluding the top 1% of values for each variable, although due to the maximum likelihood approach all cases  
302 were still included in the analyses.

303 <sup>d</sup> Variable was positively skewed and a natural log transformation was performed. The linear mixed-effects model analysis including covariates  
304 was conducted on the transformed variable and significance values provided are from the transformed analysis.

305 However, because transformed numbers are difficult to interpret, non-transformed and unadjusted means, mean changes, and standard errors  
306 for participants who completed the study visit were computed and provided in the table.

307 Multiple comparisons were adjusted for Bonferroni corrections ( $p < 0.0025$ )

308

309

310 **Table 2.** Resolution of abnormal ALT, steatosis and fibrosis (as estimated using non-invasive liver markers cut-off) from baseline to  
 311 one year in CCI and UC

| Variables                       | Continuous Care Intervention |              |                       | Usual Care |             |                      | Between-groups<br>P values <sup>b</sup> |
|---------------------------------|------------------------------|--------------|-----------------------|------------|-------------|----------------------|-----------------------------------------|
|                                 | Baseline                     | 1 year       | P value <sup>a</sup>  | Baseline   | 1 year      | P value <sup>a</sup> |                                         |
| <b>Full Cohort</b>              |                              | <b>n=262</b> |                       |            | <b>n=87</b> |                      |                                         |
| Abnormal ALT, n (%) †           | 153 (58%)                    | 60 (23%)     | 8.1x10 <sup>-11</sup> | 38 (44%)   | 35 (40%)    | .664                 | 0.006                                   |
| NAFLD-LFS                       |                              |              |                       |            |             |                      |                                         |
| > -0.640                        | 250 (95%)                    | 197 (75%)    | 7.9x10 <sup>-10</sup> | 80 (92%)   | 79 (91%)    | .678                 | 0.002                                   |
| NAFLD fibrosis score            |                              |              |                       |            |             |                      |                                         |
| < -1.455                        | 46 (18%)                     | 87 (33%)     | 3.9x10 <sup>-7</sup>  | 23 (26%)   | 22 (25%)    | 1.0                  | 0.139                                   |
| <b>Abnormal ALT at baseline</b> |                              | <b>n=153</b> |                       |            | <b>n=38</b> |                      |                                         |
| NAFLD-LFS                       |                              |              |                       |            |             |                      |                                         |
| > -0.640                        | 151 (99%)                    | 117 (76%)    | 1.8x10 <sup>-7</sup>  | 35 (92%)   | 37 (97%)    | 0.625                | 0.007                                   |
| NAFLD fibrosis score            |                              |              |                       |            |             |                      |                                         |
| < -1.455                        | 30 (20%)                     | 56 (37%)     | 4.1x10 <sup>-5</sup>  | 11 (29%)   | 11 (29%)    | 1.0                  | 0.266                                   |

312 NAFLD-LFS cutoff > -0.640 for detecting liver fat > 5.56 % (sensitivity 86% and specificity 71%).

313 NAFLD fibrosis score < -1.455 corresponds with low probability of advanced fibrosis (NPV ≈ 92%) and > 0.675 indicates high probability of  
 314 advanced fibrosis (PPV ≈ 85%).

315 † Abnormal ALT refers to >19 U/L for women and 30 U/L for men.

316 <sup>a</sup>McNemar's or <sup>b</sup>Chi-square tests were used when appropriated



318

319 *Associations between weight loss and study outcomes in the CCI group*

320 At one year, weight loss of  $\geq 5\%$  was achieved in 79% of CCI patients with 54%  
321 achieving weight loss of  $\geq 10\%$ . The proportion of patients losing weight was lower in the UC  
322 group with only 17 UC participants (19.5%) achieving  $\geq 5\%$  weight loss and only 4 (6%) with  
323  $\geq 10\%$  weight loss (**Supplementary Figure 2**). In the CCI group, there was a trend toward  
324 greater mean percentage weight loss (WL) by higher baseline BMI classification, especially in  
325 patients losing more than 5% or 10% of body weight (**Supplementary Table 1**). As shown in  
326 **Table 3**, there were relationship trends between the degree of 1-year of WL (%) and changes in  
327 liver, metabolic and non-invasive markers of steatosis and fibrosis among CCI participants. At 1  
328 year, the CCI patients who achieved  $WL \geq 10\%$  showed the greatest reductions in N-LFS  
329 ( $P < 0.001$ ) and NFS ( $P < 0.001$ ), whereas no statistically significant differences were found  
330 between patients with WL from 5%-10% versus  $< 5\%$ . Similarly, patients who achieved  $WL \geq$   
331 10% also showed decreases in HbA1c ( $P < 0.001$ ) and triglycerides ( $P < 0.001$ ) from baseline to 1  
332 year. The one-year probability of suspected fatty liver (N-LFS  $> -0.64$ ) was lower (66%) among  
333 patients with  $WL \geq 10\%$  compared to the other WL groups ( $< 5\%$  [85%] and 5%-10% [86%]).  
334 The proportion of patients with low likelihood of fibrosis at 1 year was higher among patients  
335 with  $WL \geq 10\%$  (41%) vs. patients with WL of 5-10% (26%) and  $< 5\%$  (22%).

336

337 *Correlation analyses between changes in ALT levels with changes in*

338 *metabolic parameters in the CCI group*

339 In the CCI group, changes in HbA1c, weight and fasting glucose from baseline to 1 year  
340 were associated with changes in ALT levels in the full cohort (HbA1c,  $r = 0.148$ ,  $P = 0.03$ ; weight,

341  $r=0.198$ ,  $P=0.004$ ; fasting glucose,  $r=0.176$ ,  $P=0.004$ ), and among patients with abnormal levels  
342 of ALT at baseline (HbA1c,  $r=0.253$ ,  $P=0.005$ ; weight,  $r=0.278$ ,  $P=0.003$ , fasting glucose,  
343  $r=0.305$ ,  $P<0.001$ ) (**Table 4**). Changes in other lipid markers did not correlate with changes in  
344 ALT levels (**Table 4**). **Figures 1A-1D** displays 1-year associations between change in HbA1c  
345 and normalization of ALT levels. In the full CCI group, 141 (70%) of 201 patients with HbA1c  
346 reductions of  $\geq 0.5\%$  at 1 year had normal ALT levels (**Figure 1A**). Among CCI patients with  
347 abnormal ALT levels at baseline, 77 (65%) of 119 patients with a reduction of  $\geq 0.5\%$  in HbA1c  
348 showed normalization of ALT levels (**Figure 1B**). One-year reduction of  $\geq 0.5\%$  in HbA1c  
349 increased the odds of ALT normalization 2.4 fold (95% CI: 1.09-5.3) after controlling for  
350 baseline levels of HbA1c, BMI, ALT, diabetes duration, insulin use and weight loss (%) at 1  
351 year. Given that weight reductions ( $\geq 5\%$ ) can be associated with changes in HbA1c level, we  
352 sought to explore whether a reduction of  $\geq 0.5\%$  in HbA1c was still associated with ALT  
353 normalization, independent of weight loss ( $\geq 5\%$ ) (**Figures 1C-D**). A reduction of  $\geq 0.5\%$  in  
354 HbA1c was associated with higher rates of ALT normalization, regardless of whether or not 5%  
355 weight loss was achieved,  $P<.001$ .

### 356 *Safety*

357 Adverse events during this trial were previously reported[35]. Mean platelet count was  
358 reduced in the CCI ( $-22.9 \pm 2.3$ ,  $P<0.001$ ) vs. UC group ( $-11.1 \pm 3.9$ ,  $P=0.005$ ); however, the  
359 proportion of patients with a platelet count below  $150 \times 10^9$  L was not different between groups.  
360 There was no hepatic decompensation (variceal hemorrhage, ascites or hepatic encephalopathy)  
361 or ALT flare-up ( $>5$  times the upper limit of normal) reported during the trial in either the CCI or  
362 UC group.

363

364

365 **Table 3.** One-year associations between weight loss (%) and changes in

366 liver- and diabetes-related variables. Intention-to-treat analysis.

367

| Variables                                    | CCI cohort, n=262 |               |                | P values |
|----------------------------------------------|-------------------|---------------|----------------|----------|
|                                              | ≤ 5%<br>N=54      | 5-10%<br>N=65 | >10%<br>N=143  |          |
| <b>Liver-related parameters</b>              |                   |               |                |          |
| Δ ALT (U/L) <sup>b</sup>                     | -3.99 ± 2.83      | -7.30 ± 2.32  | -12.52 ± 2.41  | 0.01     |
| Δ Platelet (x 10 <sup>9</sup> ) <sup>b</sup> | -20.36 ± 5.32     | -25.33 ± 4.38 | -23.5 ± 3.24   | 0.656    |
| Δ ALP (U/L) <sup>b</sup>                     | -4.36 ± 2.18      | -9.70 ± 1.93  | -11.45 ± 1.45* | 0.007    |
| <b>Metabolic-related parameters</b>          |                   |               |                |          |
| Δ HbA1c (%) <sup>b</sup>                     | -0.92 ± 0.21      | -1.25 ± 0.16  | -1.58 ± 0.13*  | 0.002    |
| Δ Triglycerides (mg/dl) <sup>b</sup>         | -6.25 ± 39.3      | -34.63 ± 25.8 | -63.8 ± 13.9*  | 0.007    |
| Δ Cholesterol (mg/dl) <sup>b</sup>           | 1.34 ± 7.22       | - 0.17 ± 5.78 | 10.07 ± 3.83   | 0.134    |



|                                               |                    |                      |                     |                       |
|-----------------------------------------------|--------------------|----------------------|---------------------|-----------------------|
| $\Delta$ HDL cholesterol (mg/dl) <sup>b</sup> | $-0.84 \pm 1.8$    | $6.17 \pm 1.51^{**}$ | $10.41 \pm 1.07^*$  | $4.6 \times 10^{-8}$  |
| $\Delta$ LDL cholesterol (mg/dl) <sup>b</sup> | $3.42 \pm 8.14$    | $0.53 \pm 5.15$      | $12.41 \pm 3.79$    | 0.183                 |
| <b>Kidney function parameters</b>             |                    |                      |                     |                       |
| $\Delta$ Creatinine (mg/dl) <sup>b</sup>      | $-0.023 \pm 0.022$ | $-0.008 \pm 0.019$   | $-0.065 \pm 0.017$  | 0.039                 |
| <b>Non-invasive biomarkers</b>                |                    |                      |                     |                       |
| $\Delta$ NAFLD-LFS <sup>b</sup>               | $-0.197 \pm 0.86$  | $-1.291 \pm 0.65$    | $-2.805 \pm 0.44^*$ | $2.5 \times 10^{-7}$  |
| > -0.640 <sup>a</sup>                         | 46 (85%)           | 56 (86%)             | 95 (66%)            | 0.001                 |
| $\Delta$ NAFLD fibrosis score <sup>b</sup>    | $0.055 \pm 0.13$   | $-0.351 \pm 0.10$    | $-1.014 \pm 0.08^*$ | $2.6 \times 10^{-15}$ |
| < -1.455 <sup>a</sup>                         | 14 (26%)           | 14 (22%)             | 59 (41%)            | 0.007                 |
| <b>Other parameters</b>                       |                    |                      |                     |                       |
| $\Delta$ CRP (mg/dl) <sup>b</sup>             | $-0.506 \pm 1.66$  | $-2.831 \pm 1.0$     | $-3.970 \pm 1.42$   | 0.012                 |
| $\Delta$ BHB (mmol/l) <sup>b</sup>            | $0.017 \pm 0.06$   | $0.061 \pm 0.03$     | $0.203 \pm 0.03^*$  | $3.8 \times 10^{-4}$  |

368 **Abbreviations:** ALT, alanine aminotransferase; ALP, alkaline phosphatase, **HbA1c**, Glycosylated hemoglobin; **HDL**,  
 369 high density lipoprotein; **LDL**, low density lipoprotein; **eGFR**, estimated glomerular filtration rates; **CKD-EPI**, chronic  
 370 kidney disease-epidemiological collaboration equation; **BHB**, beta-hydroxybutyrate; **NAFLD**, nonalcoholic fatty liver  
 371 disease; **LFS**, liver fat score.

372 The sign +/- means Ses. P values represent difference between groups.  $\Delta$  means change from baseline.

373 <sup>a</sup> For categorical variables, P value for the Mantel-Haenszel  $\chi^2$  test for trend; and for continuous variables

374 <sup>b</sup> Analysis of covariance (ANCOVA) while controlling by BMI and baseline values for each analyzed covariate.

375 \* Significant difference (P<0.001) between WL > 10% as compared with WL 5-10% and < 5%. \*\* Significant

376 difference (P<0.001) between WL >10% and WL 5-10% as compared with WL <5%.

377 All ANCOVA analyses were adjusted by Bonferroni test for multiple comparisons (P<0.0025)

378

379

380

381

382

383

384

385

386

387

388

389  
390  
391  
392

**Table 4.** Correlations\* change in ALT and changes in metabolic parameters.

| Variable                  | <i>Full CCI cohort</i> |                 |                   |                 | <i>CCI cohort with abnormal baseline ALT levels</i> |                 |                   |                      |
|---------------------------|------------------------|-----------------|-------------------|-----------------|-----------------------------------------------------|-----------------|-------------------|----------------------|
|                           | <i>N=262</i>           |                 |                   |                 | <i>N=153†</i>                                       |                 |                   |                      |
|                           | Unadjusted <i>r</i>    | <i>P value*</i> | Adjusted <i>r</i> | <i>P value*</i> | Unadjusted <i>r</i>                                 | <i>P value*</i> | Adjusted <i>r</i> | <i>P value*</i>      |
| Δ Body weight (%)         | 0.191                  | .043            | 0.198             | .004            | 0.253                                               | .056            | 0.278             | .003                 |
| Δ Fasting glucose (mg/dl) | 0.124                  | .118            | 0.176             | .004            | 0.184                                               | .051            | 0.305             | 1.2x10 <sup>-4</sup> |
| Δ HbA1c (%)               | 0.176                  | .043            | 0.148             | .033            | 0.220                                               | .018            | 0.253             | .005                 |
| Δ Triglycerides (mg/dl)   | 0.032                  | .741            | 0.025             | .490            | 0.091                                               | .428            | 0.106             | .163                 |
| Δ Cholesterol (mg/dl)     | -0.076                 | .375            | -0.031            | .563            | -0.046                                              | .663            | -0.020            | .605                 |
| Δ HDL cholesterol (mg/dl) | -0.115                 | .160            | -0.069            | .219            | -0.145                                              | .182            | -0.118            | .207                 |
| Δ LDL cholesterol (mg/dl) | -0.049                 | .526            | -0.022            | .476            | -0.042                                              | .669            | -0.032            | .690                 |

**Abbreviations:** ALT, alanine aminotransferase; HbA1c, glycosylated hemoglobin; HDL, high-density lipoprotein; LDL, low-density lipoprotein.

395 Unadjusted and adjusted Pearson's correlations. Adjustments while controlling for individual baseline covariate levels, age, sex, race (African American vs.  
396 her), diabetes duration, body mass index (BMI), and insulin use

397 ALT levels > 19 in women and > 30 in men.

398 means change from baseline.

399 **DISCUSSION**

400           The findings of the current analysis show that one year of a digitally-supported CCI  
401 reduced risk of fatty liver and advanced liver fibrosis in overweight and obese adults with T2D.  
402 Improvements were concurrent with improved glycemic status, reduction in cardiovascular risk  
403 factors and decreased use of medications for diabetes and hypertension[36,47]. The beneficial  
404 effects extended to patients with increased levels of aminotransferase, thus indicating that remote  
405 care medically-supervised ketosis is also effective in patients at risk of liver disease progression.  
406 The influence of carbohydrate restriction and nutritional ketosis on liver histology of patients  
407 with biopsy-proven NASH remains largely unexplored in the context of a well-designed RCT. A  
408 pilot study including five patients with biopsy-proven NASH showed that 6-months of KD (less  
409 than 20 grams per day of carbohydrate) induced significant WL (mean of 13 kg) and four of five  
410 patients reduced liver fat, inflammation, and fibrosis [33]. The current study provides evidence  
411 that a remote-care medically-supervised KD can improve NASH and even fibrosis. A recent  
412 meta-analysis of ten studies reported the effects of LCD on liver function tests in patients with  
413 NAFLD, and concluded that LCD reduced IHLC, but did not improve liver enzymes[35],  
414 although heterogeneity among NAFLD populations and interventions were observed across the  
415 included studies.

416           Among CCI participants, correlations were also found between the improvements in  
417 HbA1c and ALT changes, even after controlling for WL and changes in insulin use. Among  
418 subjects with abnormal ALT levels at baseline, a reduction of  $\geq 0.5\%$  in HbA1c was associated  
419 with increased rates of ALT normalization. This finding suggests that liver enzyme  
420 improvements may be related to improvements in glycemic control and insulin concentration in  
421 addition to weight loss. Importantly, few studies have directly compared the metabolic

422 advantages of different diets for the treatment of NAFLD[15, 32, 48], and the impact of dietary  
423 macronutrient composition remains largely unknown. Three studies have shown that low-  
424 carbohydrate and low-fat diets reduced liver fat, transaminases and insulin resistance to similar  
425 degrees[15, 21, 48], whereas another study reported that a moderate hypocaloric low-  
426 carbohydrate diet in insulin resistant patients improved ALT levels more than a hypocaloric low-  
427 fat diet, despite equal weight loss[48]. Among patients with T2D, a “moderate-carbohydrate  
428 modified Mediterranean diet” (35% carbohydrates, 45% high monounsaturated fat) showed  
429 greater ALT reductions than two other higher carbohydrate hypocaloric diets including the 2003  
430 recommended ADA or low glycemic index diets[49].

431 Our results also demonstrated that non-invasive risk scores for fatty liver and fibrosis  
432 were improved in patients who underwent CCI as compared to the UC control, and greater  
433 reductions were observed in patients with the largest reductions in body weight ( $\geq 10\%$ ). Our  
434 results are consistent with previous studies reporting that LCD reduce intrahepatic lipid  
435 accumulation[15, 16, 21, 32, 33]. Likewise, 1-year liver fibrosis as assessed by NFS improved in  
436 the CCI group, and the proportion of patients with low likelihood of fibrosis increased from 18%  
437 to 33% at 1 year of intervention. Similar to previous studies addressing the impact of weight loss  
438 on NASH-related fibrosis[13, 50], we showed a relationship between the degree of weight loss  
439 and improvements in NFS.

440 LCD or KD have been proposed to more effectively reduce all features of the metabolic  
441 syndrome, which is present in approximately 80% of NAFLD patients, compared to low-fat diets  
442 [51, 52]; however, the physiological mechanisms are not fully established[53-55]. In line with  
443 our findings, Holland et al.[56] showed that irrespective of physical exercise, rats fed a ketogenic  
444 formulation had lower liver triglycerides and lower activation of the pro-inflammatory NF-kB

445 pathway compared to rats fed Western and standard chow diets. Likewise, a recent human study  
446 using a two-week isocaloric carbohydrate restricted diet, not only demonstrated a drastic  
447 reduction of hepatic steatosis, but a shift in lipid metabolism pathway from de-novo lipogenesis  
448 to  $\beta$ -oxidation and increased BHB production[57]. This shift in the lipid homeostasis following a  
449 short-term ketogenic diet occurred in conjunction with a shift in gut microbiota towards increased  
450 folate production as well as decreased expression of key serum inflammatory markers[57].

451 Strengths and weaknesses of this clinical trial have been previously described[36]. Some  
452 strengths of this study include a large cohort of patients with T2D and high suspicion of NAFLD,  
453 an intervention with one-year of digitally-supported continuous care including monitored  
454 adherence to nutritional ketosis, and a control group of patients with T2D provided usual care  
455 with standard nutritional recommendations[36]. Relative to prior outpatient interventions, the  
456 current study is unusual in the degree of health coach and physician support, the degree of  
457 prescribed carbohydrate restriction and the use of BHB as a blood biomarker of dietary  
458 adherence. These attributes may contribute to superior outcomes observed in the intervention  
459 group when compared to UC patients. The multi-component approach used in the intervention,  
460 not only encouraged the patient to adapt carbohydrate restriction through continuous monitoring  
461 of nutritional ketosis but also provided behavioral support through interaction with their health  
462 coaches.

463 Some weaknesses of this study include the absence of imaging- or biopsy-proven  
464 NAFLD or NASH diagnosis and lack of random allocation to assign patients to intervention and  
465 control groups. Food was not provided for participants so dietary macronutrient and  
466 micronutrient contents and sources were not strictly controlled.

467           In conclusion, one year of a digitally-supported continuous care intervention including  
468 individualized nutritional ketosis led to significant improvement in non-invasive markers of liver  
469 fat and fibrosis together with sustained weight loss in overweight and obese type 2 diabetes  
470 patients. A relationship was observed between the degree of weight loss and improvements in  
471 liver- and non-liver-related outcomes with greater benefits in patients losing more than 10% of  
472 body weight. A reduction of  $\geq 0.5\%$  in HbA1c was independently associated with ALT  
473 normalization even after controlling for weight loss. Medical interventions incorporating  
474 ketogenic diets appear effective for improving NAFLD, and therefore, may be an effective  
475 approach for reversing the natural history of NAFLD progression, although further studies are  
476 needed to confirm potential beneficial effect in patients with biopsy-confirmed NASH.

477

478

479

480

481

482

483

484

485

486

487

488

489

490

491

492



493 **Acknowledgments**

494 Authors thank Drs. Marwan Ghabril and Raj Vuppalanchi for their helpful discussions with  
495 various analyses. The authors also thank the study participants for their active involvement in the  
496 study.

497 **Competing Interests Statement:** SJA, SJH, NHB, ALM, RNA, JPM, and SDP are employees  
498 of Virta Health Corp. and have been offered stock options. SDP and JSV are founders of Virta  
499 Health Corp. EVG, WWC and NC have nothing relevant to declare.

500 **Financial support:** Virta Health funded this study.

501 **Author contributions**

502 E.V.G, S.J.A, R.N.A, J.P.M and N.P.C wrote the manuscript. A.L.M, N.H.B, S.J.H and S.J.A  
503 participated in data acquisition. E.V.G and S.J.A analyzed the data. N.P.C, S.J.H, N.H.B, A.L.M,  
504 W.W.C, J.P.M, S.D.P and J.S.V supervised this particular analysis and edited the manuscript. All  
505 authors approved the final version of the manuscript.

506

507

508

509

510

511

512

513

514

515

516

517 **REFERENCES**

- 518 1. Estes C, Razavi H, Loomba R, et al. Modeling the epidemic of nonalcoholic fatty liver  
519 disease demonstrates an exponential increase in burden of disease. *Hepatology*  
520 2018;67:123-33.
- 521 2. Younossi ZM, Koenig AB, Abdelatif D, et al. Global epidemiology of nonalcoholic fatty  
522 liver disease-Meta-analytic assessment of prevalence, incidence, and outcomes.  
523 *Hepatology* 2016;64:73-84.
- 524 3. Byrne CD, Targher G. NAFLD: a multisystem disease. *J Hepatol* 2015;62:S47-64.
- 525 4. Adams LA, Anstee QM, Tilg H, et al. Non-alcoholic fatty liver disease and its  
526 relationship with cardiovascular disease and other extrahepatic diseases. *Gut*  
527 2017;66:1138-53.
- 528 5. Portillo-Sanchez P, Bril F, Maximos M, et al. High Prevalence of Nonalcoholic Fatty  
529 Liver Disease in Patients With Type 2 Diabetes Mellitus and Normal Plasma  
530 Aminotransferase Levels. *J Clin Endocrinol Metab* 2015;100:2231-8.
- 531 6. Hazlehurst JM, Woods C, Marjot T, et al. Non-alcoholic fatty liver disease and diabetes.  
532 *Metabolism* 2016;65:1096-108.
- 533 7. Angulo P, Kleiner DE, Dam-Larsen S, et al. Liver Fibrosis, but No Other Histologic  
534 Features, Is Associated With Long-term Outcomes of Patients With Nonalcoholic Fatty  
535 Liver Disease. *Gastroenterology* 2015;149:389-97.
- 536 8. Ekstedt M, Hagstrom H, Nasr P, et al. Fibrosis Stage Is the Strongest Predictor for  
537 Disease-Specific Mortality in NAFLD After Up to 33 Years of Follow-Up. *Hepatology*  
538 2015;61:1547-54.
- 539 9. Adams LA, Lymp JF, St Sauver J, et al. The natural history of nonalcoholic fatty liver  
540 disease: a population-based cohort study. *Gastroenterology* 2005;129:113-21.

- 541 10. Vilar-Gomez E, Calzadilla-Bertot L, Wai-Sun Wong V, et al. Fibrosis severity as a  
542 determinant of cause-specific mortality in patients with advanced nonalcoholic fatty liver  
543 disease: A multi-national cohort study. *Gastroenterology* 2018; 155: 443-57.
- 544 11. Chalasani N, Younossi Z, Lavine JE, et al. The diagnosis and management of  
545 nonalcoholic fatty liver disease: Practice guidance from the American Association for the  
546 Study of Liver Diseases. *Hepatology* 2018;67:328-57.
- 547 12. European Association for the Study of the L, European Association for the Study of D,  
548 European Association for the Study of O. EASL-EASD-EASO Clinical Practice  
549 Guidelines for the management of non-alcoholic fatty liver disease. *J Hepatol*  
550 2016;64:1388-402.
- 551 13. Vilar-Gomez E, Martinez-Perez Y, Calzadilla-Bertot L, et al. Weight Loss Through  
552 Lifestyle Modification Significantly Reduces Features of Nonalcoholic Steatohepatitis.  
553 *Gastroenterology* 2015;149:367-78.
- 554 14. Zelber-Sagi S, Kessler A, Brazowsky E, et al. A double-blind randomized placebo-  
555 controlled trial of orlistat for the treatment of nonalcoholic fatty liver disease. *Clin*  
556 *Gastroenterol Hepatol* 2006;4:639-44.
- 557 15. Haufe S, Engeli S, Kast P, et al. Randomized Comparison of Reduced Fat and Reduced  
558 Carbohydrate Hypocaloric Diets on Intrahepatic Fat in Overweight and Obese Human  
559 Subjects. *Hepatology* 2011;53:1504-14.
- 560 16. Browning JD, Baker JA, Rogers T, et al. Short-term weight loss and hepatic triglyceride  
561 reduction: evidence of a metabolic advantage with dietary carbohydrate restriction. *Am J*  
562 *Clin Nutr* 2011;93:1048-52.

- 563 17. Ryan MC, Itsiopoulos C, Thodis T, et al. The Mediterranean diet improves hepatic  
564 steatosis and insulin sensitivity in individuals with non-alcoholic fatty liver disease. *J*  
565 *Hepatol* 2013;59:138-43.
- 566 18. Eckard C, Cole R, Lockwood J, et al. Prospective histopathologic evaluation of lifestyle  
567 modification in nonalcoholic fatty liver disease: a randomized trial. *Therap Adv*  
568 *Gastroenterol* 2013;6:249-59.
- 569 19. Wong VW, Chan RS, Wong GL, et al. Community-based lifestyle modification  
570 programme for non-alcoholic fatty liver disease: a randomized controlled trial. *J Hepatol*  
571 2013;59:536-42.
- 572 20. Trovato FM, Catalano D, Martines GF, et al. Mediterranean diet and non-alcoholic fatty  
573 liver disease: the need of extended and comprehensive interventions. *Clin Nutr*  
574 2015;34:86-8.
- 575 21. Kirk E, Reeds DN, Finck BN, et al. Dietary Fat and Carbohydrates Differentially Alter  
576 Insulin Sensitivity During Caloric Restriction. *Gastroenterology* 2009;136:1552-60.
- 577 22. Promrat K, Kleiner DE, Niemeier HM, et al. Randomized Controlled Trial Testing the  
578 Effects of Weight Loss on Nonalcoholic Steatohepatitis. *Hepatology* 2010;51:121-9.
- 579 23. Tobias DK, Chen M, Manson JE, et al. Effect of low-fat diet interventions versus other  
580 diet interventions on long-term weight change in adults: a systematic review and meta-  
581 analysis. *Lancet Diabetes Endocrinol* 2015;3:968-79.
- 582 24. Sackner-Bernstein J, Kanter D, Kaul S. Dietary Intervention for Overweight and Obese  
583 Adults: Comparison of Low-Carbohydrate and Low-Fat Diets. A Meta-Analysis. *Plos*  
584 *One* 2015;10.

- 585 25. Mansoor N, Vinknes KJ, Veierod MB, et al. Effects of low-carbohydrate diets v. low-fat  
586 diets on body weight and cardiovascular risk factors: a meta-analysis of randomised  
587 controlled trials. *Br J Nutr* 2016;115:466-79.
- 588 26. Gardner CD, Kiazand A, Alhassan S, et al. Comparison of the Atkins, Zone, Ornish, and  
589 LEARN diets for change in weight and related risk factors among overweight  
590 premenopausal women: the A TO Z Weight Loss Study: a randomized trial. *JAMA*  
591 2007;297:969-77.
- 592 27. Goday A, Bellido D, Sajoux I, et al. Short-term safety, tolerability and efficacy of a very  
593 low-calorie-ketogenic diet interventional weight loss program versus hypocaloric diet in  
594 patients with type 2 diabetes mellitus. *Nutr Diabetes* 2016;6: e230. doi:  
595 10.1038/nutd.2016.36.
- 596 28. Wheeler ML, Dunbar SA, Jaacks LM, et al. Macronutrients, Food Groups, and Eating  
597 Patterns in the Management of Diabetes A systematic review of the literature, 2010.  
598 *Diabetes Care* 2012;35:434-445.
- 599 29. Johnstone AM, Horgan GW, Murison SD, et al. Effects of a high-protein ketogenic diet  
600 on hunger, appetite, and weight loss in obese men feeding ad libitum. *Am J Clin Nutr*  
601 2008;87:44-55.
- 602 30. Volynets V, Machann J, Kuper MA, et al. A moderate weight reduction through dietary  
603 intervention decreases hepatic fat content in patients with non-alcoholic fatty liver  
604 disease (NAFLD): a pilot study. *Eur J Nutr* 2013;52:527-35.
- 605 31. Kani AH, Alavian SM, Esmailzadeh A, et al. Effects of a novel therapeutic diet on liver  
606 enzymes and coagulating factors in patients with non-alcoholic fatty liver disease: A  
607 parallel randomized trial. *Nutrition* 2014;30:814-21.

- 608 32. de Luis DA, Aller R, Izaola O, et al. Effect of two different hypocaloric diets in  
609 transaminases and insulin resistance in nonalcoholic fatty liver disease and obese  
610 patients. *Nutr Hosp* 2010;25:730-5.
- 611 33. Tendler D, Lin SY, Yancy WS, et al. The effect of a low-carbohydrate, ketogenic diet on  
612 nonalcoholic fatty liver disease: A pilot study. *Dig Dis Sci* 2007;52:589-93.
- 613 34. Huang MA, Greenson JK, Chao C, et al. One-year intense nutritional counseling results  
614 in histological improvement in patients with non-alcoholic steatohepatitis: A pilot study.  
615 *Am J Gastroenterol* 2005;100:1072-81.
- 616 35. Haghghatdoost F, Salehi-Abargouei A, Surkan PJ, et al. The effects of low carbohydrate  
617 diets on liver function tests in nonalcoholic fatty liver disease: A systematic review and  
618 meta-analysis of clinical trials. *J Res Med Sci* 2016;21:53.
- 619 36. Hallberg SJ, McKenzie AL, Williams PT, et al. Effectiveness and safety of a novel care  
620 model for the management of type 2 diabetes at 1 year: an open-label, non-randomized,  
621 controlled study. *Diabetes Ther* 2018; 9:583-612.
- 622 37. Standards of Medical Care in Diabetes-2015: Summary of Revisions. *Diabetes Care*  
623 2015;38:S4-S4.
- 624 38. Kotronen A, Peltonen M, Hakkarainen A, et al. Prediction of Non-Alcoholic Fatty Liver  
625 Disease and Liver Fat Using Metabolic and Genetic Factors. *Gastroenterology*  
626 2009;137:865-872.
- 627 39. Machado MV, Cortez-Pinto H. Non-invasive diagnosis of non-alcoholic fatty liver  
628 disease. A critical appraisal. *J Hepatol* 2013;58:1007-19.
- 629 40. Angulo P, Hui JM, Marchesini G, et al. The NAFLD fibrosis score: a noninvasive system  
630 that identifies liver fibrosis in patients with NAFLD. *Hepatology* 2007;45:846-54.

- 631 41. Vilar-Gomez E, Chalasani N. Non-invasive assessment of non-alcoholic fatty liver  
632 disease: Clinical prediction rules and blood-based biomarkers. *J Hepatol* 2018;68:305-15.
- 633 42. Sun W, Cui H, Li N, et al. Comparison of FIB-4 index, NAFLD fibrosis score and BARD  
634 score for prediction of advanced fibrosis in adult patients with non-alcoholic fatty liver  
635 disease: A meta-analysis study. *Hepatol Res* 2016; 46:862-70.
- 636 43. Prati D, Taioli E, Zanella A, et al. Updated Definitions of Healthy Ranges for Serum  
637 Alanine Aminotransferase Levels. *Ann Intern Med.* 2002;137:1–10.
- 638 44. Kline RB. Convergence if structural equation modeling and multilevel modeling. In  
639 M.Williams &W.P.Vogt (Eds.), *Handbook of methodological innovation in social*  
640 *research methods* 2011; 562-589.
- 641 45. John JA, Draper NR. An alternative family of transformations. *Appl Statist* 1980; 29:  
642 190-197.
- 643 46. Kim WR, Flamm SL, Di Bisceglie AD, et al. Serum activity of alanine aminotransferase  
644 (ALT) as an indicator of health and disease. *Hepatology* 2008; 47: 1363-70.
- 645 47. Bhanpuri NH, Hallberg SJ, Williams PT, et al. Cardiovascular Disease Risk Factor  
646 Responses to a Type 2 Diabetes Care Model Including Nutritional Ketosis Induced by  
647 Sustained Carbohydrate Restriction at One Year: An Open Label, Non-Randomized,  
648 Controlled Study (in press).
- 649 48. Ryan MC, Carter S, Abbasi F, et al. Serum alanine aminotransferase levels decrease  
650 further with carbohydrate than fat restriction in insulin-resistant adults. *Diabetes Care*  
651 2007;30:1075-80.

- 652 49. Fraser A, Abel R, Lawlor DA, et al. A modified Mediterranean diet is associated with the  
653 greatest reduction in alanine aminotransferase levels in obese type 2 diabetes patients:  
654 results of a quasi-randomised controlled trial. *Diabetologia* 2008;51:1616-22.
- 655 50. Glass LM, Dickson RC, Anderson JC, et al. Total body weight loss of  $\geq 10\%$  is  
656 associated with improved hepatic fibrosis in patients with nonalcoholic steatohepatitis.  
657 *Dig Dis Sci* 2015;60:1024-30.
- 658 51. Volek JS, Fernandez ML, Feinman RD, et al. Dietary carbohydrate restriction induces a  
659 unique metabolic state positively affecting atherogenic dyslipidemia, fatty acid  
660 partitioning, and metabolic syndrome. *Prog Lipid Res* 2008;47:307-18.
- 661 52. Volek JS, Phinney SD, Forsythe CE, et al. Carbohydrate Restriction has a More  
662 Favorable Impact on the Metabolic Syndrome than a Low Fat Diet. *Lipids* 2009;44:297-  
663 309.
- 664 53. Samaha FF, Iqbal N, Seshadri P, et al. A low-carbohydrate as compared with a low-fat  
665 diet in severe obesity. *N Engl J Med* 2003;348:2074-81.
- 666 54. Foster GD, Wyatt HR, Hill JO, et al. A randomized trial of a low-carbohydrate diet for  
667 obesity. *N Engl J Med* 2003;348:2082-90.
- 668 55. Yancy WS, Jr., Olsen MK, Guyton JR, et al. A low-carbohydrate, ketogenic diet versus a  
669 low-fat diet to treat obesity and hyperlipidemia: a randomized, controlled trial. *Ann Intern*  
670 *Med* 2004;140:769-77.
- 671 56. Holland AM, Kephart WC, Mumford PW, et al. Effects of a ketogenic diet on adipose  
672 tissue, liver, and serum biomarkers in sedentary rats and rats that exercised via resisted  
673 voluntary wheel running. *Am J Physiol Regul Integr Comp Physiol* 2016;311:R337-51.



674 57. Mardinoglu A, Wu H, Bjornson E, et al. An integrated understanding of the rapid metabolic  
675 benefits of a carbohydrate-restricted diet on hepatic steatosis in humans. *Cell Metab* 2018;  
676 <https://doi.org/10.1016/j.cmet.2018.01.005>.

677

678

679

680

681

682

683

## RESULTS LEGENDS

**Figure 1.** Association between reduction in HbA1c (%) and normalization of ALT\* levels at 1 year of intervention in CCI group  
Full CCI cohort (n=272)

For proportion of patients with ALT normalization were observed in HbA1c (%) reduction categories 0.5-10%; 71% and >

CCI patients with increased levels of ALT at baseline (n=153)

For proportion of patients with ALT normalization were observed in HbA1c (%) reduction categories 0.5-1%; 67% and >1%

Adjusted OR for change in HbA1c > 0.5% = 2.4 (95% CI: 1.09-5.3), P=0.029

CCI patients with weight loss  $\geq$  5% (n=207).

Among patients with weight loss  $\geq$  5%, higher levels of ALT normalization (85%) were observed in patients with HbA1c (%)

>0.5%.

CCI patients with increased levels of ALT at baseline and weight loss  $\geq$  5% (n=123).

Among patients with weight loss  $\geq$  5% and abnormal ALT levels at baseline, higher levels of ALT normalization (86%) were observed

in patients with HbA1c (%) reduction of >0.5%.

Gamma levels  $\leq$  19 in women and  $\leq$  30 in men.

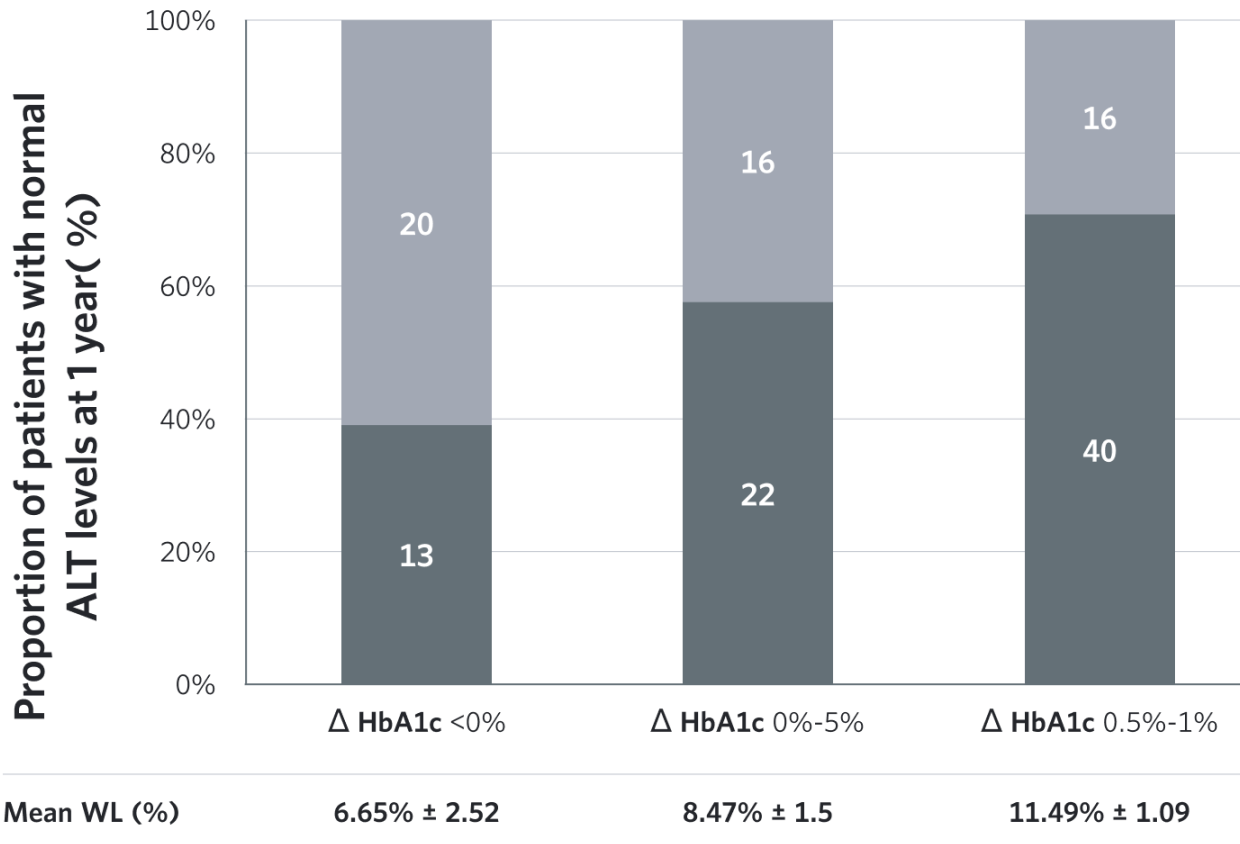

Adjusted OR for change in HbA1c > 0.5% = 2.4 (95% CI: 1.09-5.3), P=0.001

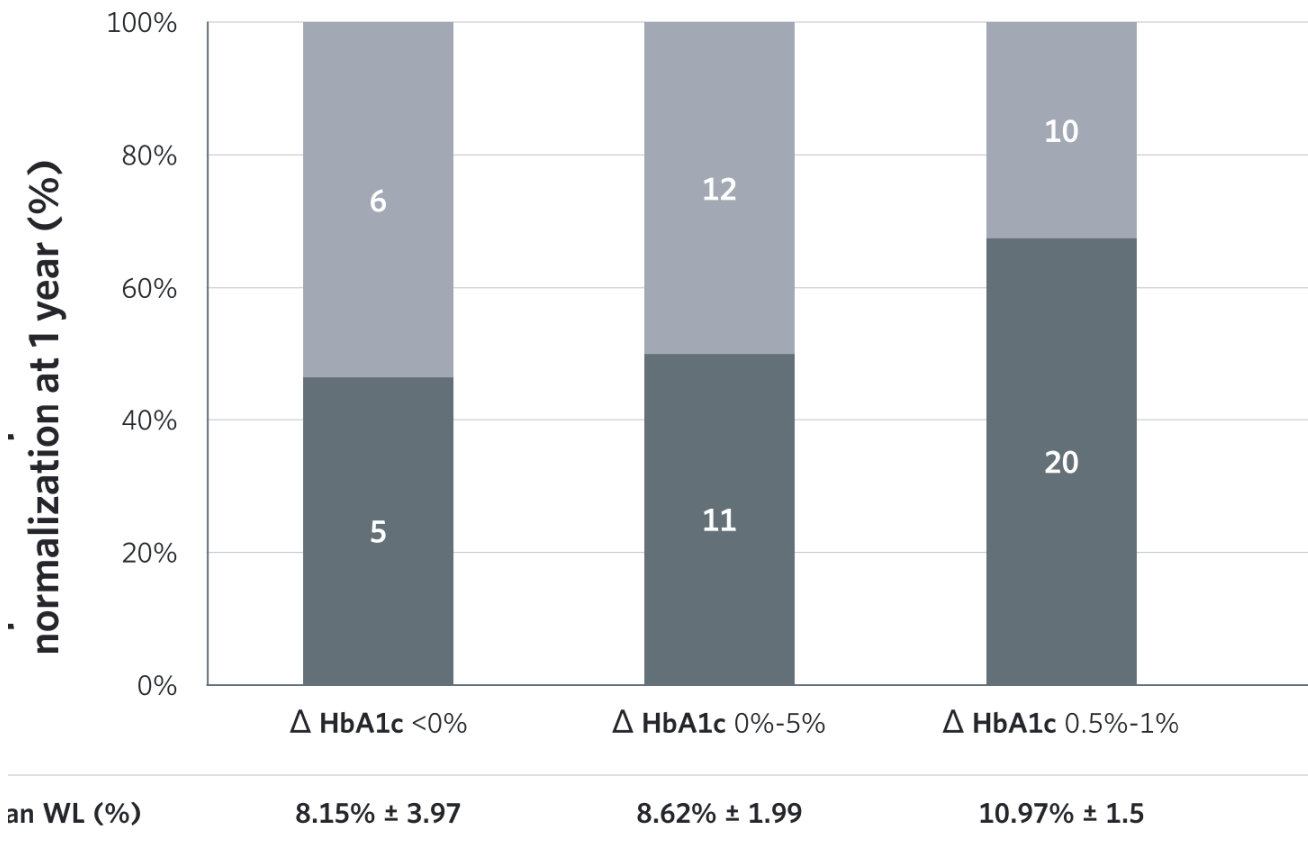

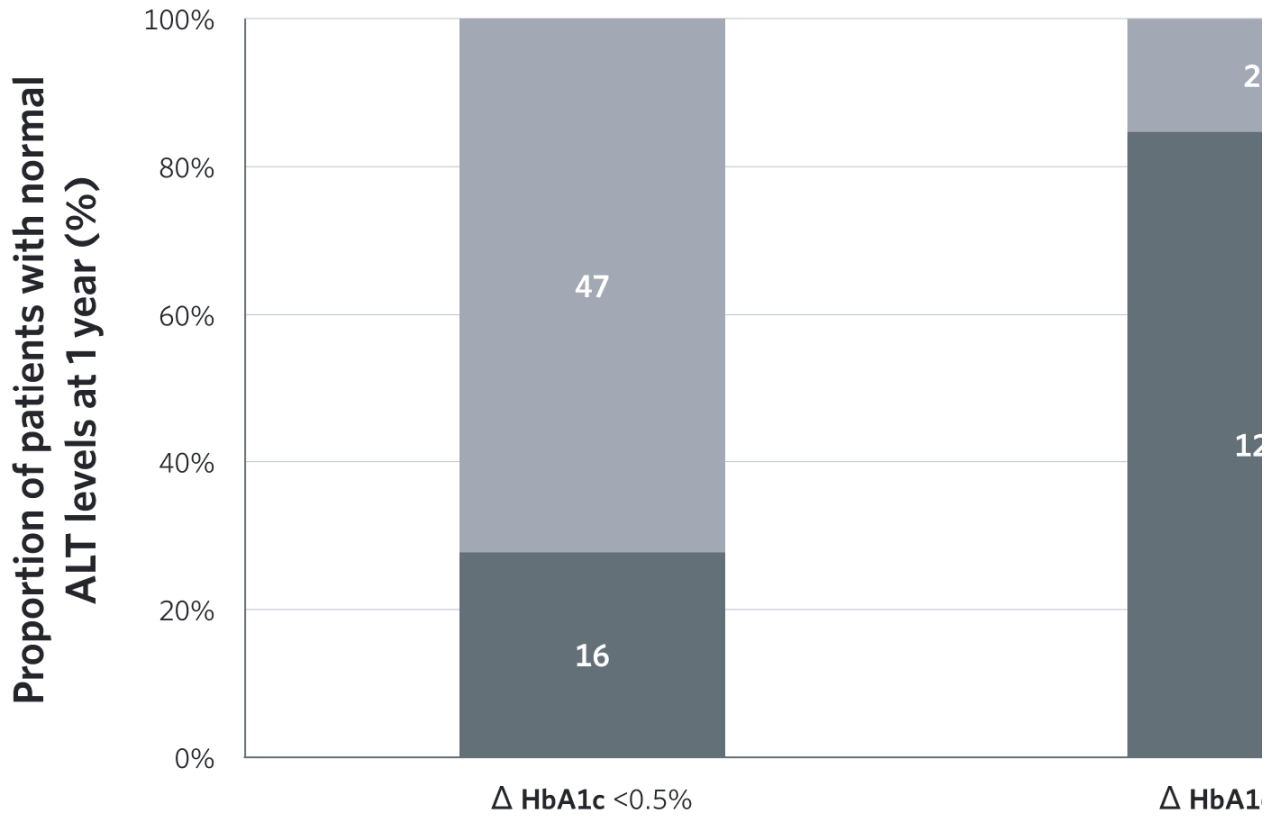

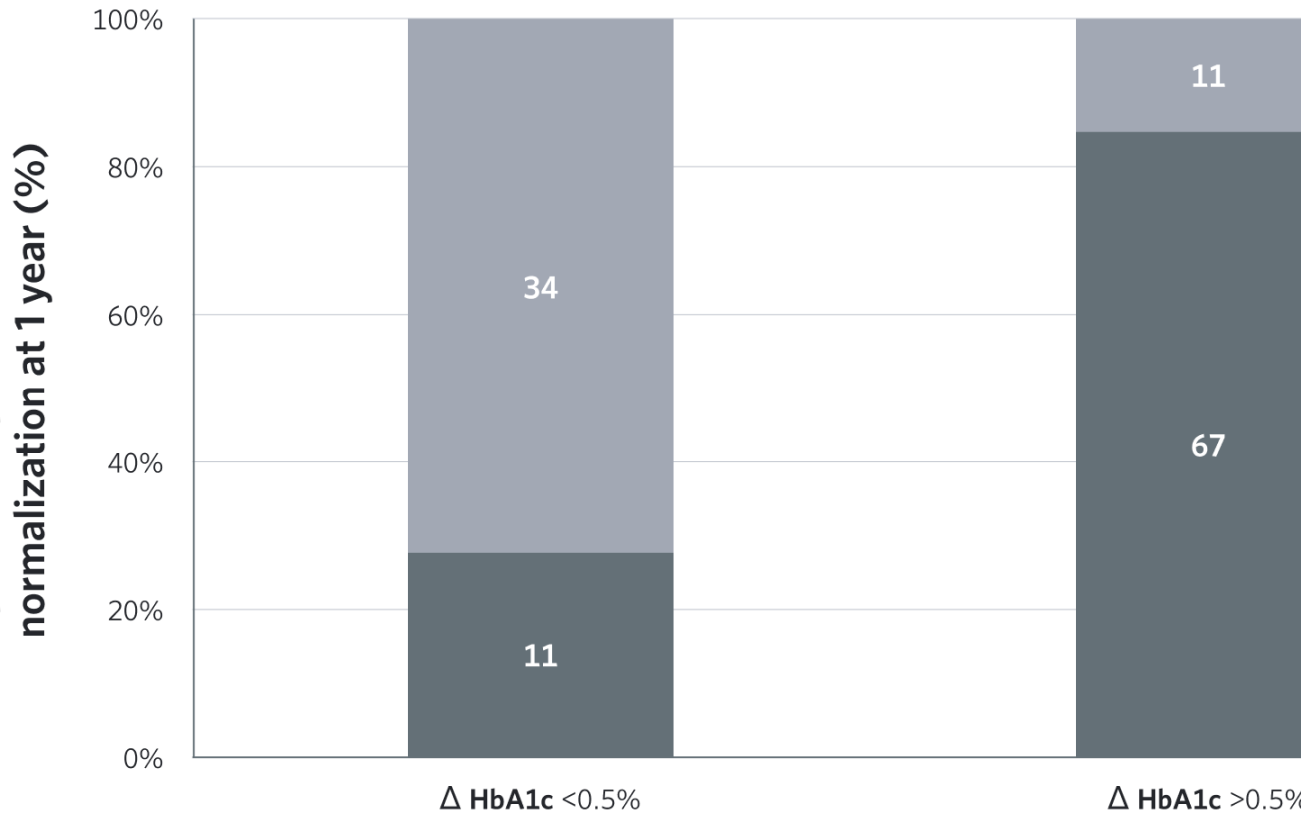

Source: https://www.biorxiv.org/content/10.1101/293548v2.full.pdf
